# Supplementary material
Source: HighWire-hosted journal article supplement (https://erj.ersjournals.com/content/55/2/1901314)
Supplement: inline-supplementary-material-1 [file inline-supplementary-material-1.pdf]

## **SUPPLEMENTARY MATERIAL**

### **High-sensitivity troponin I and all-cause mortality in patients with stable COPD: An analysis of the COSYCONET study**

Benjamin Waschki, Peter Alter, Tanja Zeller, Christina Magnussen, Johannes T. Neumann, Raphael Twerenbold, Christoph Sinning, Christian Herr, Kathrin Kahnert, Sebastian Fähndrich, Stefan Blankenberg, Klaus F. Rabe, Tobias Welte, Rudolf A. Jörres, Claus F. Vogelmeier, Robert Bals\* and Henrik Watz\* on behalf of the German COSYCONET Cohort

\* Authors contributed equally as last author of the manuscript

## Methods

### Study design and patients

This report describes a longitudinal observation analysis that involved 2085 patients with stable COPD from the ongoing COSYCONET (COPD and Systemic Consequences–Comorbidities Network) cohort study. The overall aims and methods of COSYCONET have been described previously.<sup>(1)</sup> In brief, the central purpose of COSYCONET is to analyze the prevalence and severity of extrapulmonary disorders and to quantify the impact of extrapulmonary organ manifestations on morbidity and mortality of patients with COPD.<sup>(1)</sup> The baseline visit took place between 2010 and 2013 in 31 German study centers. Patients were recruited primarily following referral from respiratory specialists and primary care practitioners. Inclusion criteria were broad (age  $\geq 40$  years; diagnosis of COPD or chronic bronchitis, and availability for repeated study visits for at least 18 months), with minimal exclusion criteria applied (i.e., major lung surgery, lung tumor and relevant physical or cognitive impairment) in order to cover a wide range of patterns of the disease.<sup>(1)</sup> All patients had to have stable COPD, which we defined as not having experienced a moderate or severe exacerbation during the four weeks preceding study entry. A total of 2741 patients were included and underwent a broad panel of assessments, guided by standard operating procedures on the basis of established guidelines, with priority given to the assessment of pulmonary function and cardiovascular comorbidities. Follow-up visits were scheduled at 6, 18, 36, and 54 months after the baseline visit. For the present report, we included patients with a confirmed GOLD stage from 1 to 4 (i.e., ratio of post-bronchodilator forced expiratory volume [FEV<sub>1</sub>] to forced vital capacity [FVC]  $< 0.7$ ). A detailed patient flow chart is given in the online data supplement (Figure E1).

COSYCONET was approved by the ethical committees of all study centers and all patients gave written informed consent. The cohort study is registered on [clinicaltrials.gov](https://clinicaltrials.gov/ct2/show/study/NCT01245933) (NCT01245933).

## **COPD assessments**

Lung function was measured using standardized procedures as described previously.<sup>(1, 2)</sup> Dyspnea was assessed using the modified Medical Research Council (mMRC) dyspnea scale. Exercise capacity was evaluated via the 6-minute walk distance (6MWD). Both variables were used as continuous variables and dichotomized using the cut-off of  $\geq 2$  for mMRC and  $< 350$  m for 6MWD.<sup>(3, 4)</sup> The BODE index (body-mass index [BMI], airway obstruction, dyspnea, and exercise capacity), which is the most frequently used prognostic assessment in COPD, was calculated, with a cut-off of  $> 4$  used to dichotomize the index.<sup>(4)</sup> Exacerbations during the 12 months prior to recruitment were recorded from a structured interview. Mild exacerbations were defined as those with symptomatic deterioration requiring any action, moderate exacerbations were defined as those with symptomatic deterioration requiring treatment with antibiotics or oral corticosteroids, whereas severe exacerbations were those with symptomatic deterioration resulting in hospital admission.<sup>(3)</sup> The patients were categorized into GOLD groups A to D based on the mMRC scale.<sup>(5)</sup> The exacerbation risk for the ABCD grouping was based on the 12-month history of exacerbations of all severities, with high risk indicated by a history of two or more non-hospitalized exacerbations or one or more exacerbation leading to hospital admission.<sup>(6)</sup> On the basis of blood gas analyses, hypoxemia was defined as  $\text{PaO}_2 < 55$  mmHg or that required oxygen therapy, with hypercapnia defined as  $\text{PaCO}_2 > 50$  mmHg.<sup>(7)</sup>

## **Assessment and definition of cardiovascular risk factors and cardiovascular diseases**

History of myocardial infarction and history of stroke were systematically recorded in a structured interview.(1) A combination of self-reported comorbidities and disease-specific medication was the basis for the definition of arterial hypertension, diabetes mellitus, hyperlipidemia, and coronary artery disease, with objective measurements also taken into consideration for the detection of arterial hypertension (systolic blood pressure  $\geq 140$  mmHg), diabetes mellitus (glycated hemoglobin level  $\geq 48$  mmol per mole [ $\geq 6.5\%$ ]), and hyperlipidemia (total cholesterol / high-density lipoprotein [HDL] cholesterol ratio  $\geq 5$ ). (8, 9) All other cardiovascular risk factors, cardiovascular diseases, and cardiac dysfunctions were defined solely on the basis of objective measurements. Thus, chronic kidney disease more than mild was defined as estimated glomerular filtration rate (eGFR)  $< 60$  mL/min/1.73m<sup>2</sup>. (9, 10) The ankle-brachial index (ABI) was measured as previously described, with a value  $\leq 0.9$  being both an established measure of peripheral artery disease and an indicator of asymptomatic atherosclerotic disease. (9, 11, 12). High-sensitivity C-reactive protein (hs-CRP) is the most frequently used marker of systemic inflammation and was used as an additional cardiovascular risk factor. (9) NT-proBNP was used as a marker for heart failure, given that an increased level is a main diagnostic criterion. (13) Echocardiography was performed using standard methodology as previously described with left ventricular ejection fraction (LVEF) and tricuspid annular plane systolic excursion (TAPSE) used to detect left and right heart dysfunction, respectively. (14, 15) Systolic left ventricular dysfunction was defined as LVEF  $< 50\%$  according to European Society of Cardiology (ESC) criteria, whereas right heart dysfunction was primarily defined as TAPSE  $< 17$  mm as per American Society of Echocardiography (ASE) recommendations. (13, 15) In the case of missing values for

TAPSE but available visual grading of the right ventricular function, we categorized subjects with a reduced RV function based on visual inspection as right ventricular dysfunction.

## **Outcome**

The primary outcome of this report was all-cause mortality over three years of follow-up. After baseline, patients were invited for each follow-up visit via telephone and letters. If a patient missed a follow-up visit without formally withdrawing from the study, research assistants ascertained the survival status (and in case of death the date of death) by contacting partners, relatives, primary care practitioners and hospitals. Where an exact date of death was not available the date was imputed (assuming the 15<sup>th</sup> of the month if the month but not the date was known, the middle of the year if only the year was known, and on the basis of the date of the last contact if the date was totally unknown).

The risk of future COPD exacerbations was assessed by the history of exacerbations reported at the follow-up visits 2 to 4 over three years after the baseline visit. In case of one or two missing follow-up visits the information was used from the available follow-up visit (i.e. at least one).

## **Statistical analyses**

For the descriptive analyses hs-TnI was categorized into quartiles. For the further analyses hs-TnI was both dichotomized according to the cut-off of 6 ng/L, and was used as a continuous variable (after log-transformation since hs-TnI was not normally distributed across the study patients). Linear trends in patient

demographics, cardiovascular markers and COPD assessments across the hs-TnI quartiles were analyzed using  $\chi^2$  tests for dichotomized variables and analysis of variance or Kruskal-Wallis test for continuous variables (depending on distribution and homogeneity of variances). The association between continuous log-transformed hs-TnI values and COPD assessments was also tested after adjustment for the traditional cardiovascular risk factors age, sex, smoking status, hypertension, and hyperlipidemia along with the presence of coronary artery disease and history of myocardial infarction.(9) Therefore, we used separate logistic regression analyses with each dichotomized COPD assessment as the dependent variable, i.e., severe or very severe COPD, mMRC score  $\geq 2$ , 6MWD  $< 350$ m, BODE score  $> 4$ ,  $\geq 1$  severe exacerbation in the prior year, hypoxemia, and hypercapnia, respectively.

To identify the best model of independent predictors for higher hs-TnI levels among cardiovascular markers and COPD assessments, we categorized hs-TnI according to the cut-off value of 6 ng/L for the identification of high-risk patients, which served as the dependent variable. We performed a logistic regression analysis with backward elimination including all variables which showed  $p < 0.10$  across the hs-TnI quartiles on the univariate level.

The relation between hs-TnI quartiles and all-cause mortality was analyzed by Kaplan-Meier survival plots and log-rank tests. To calculate the relative risk of mortality associated with hs-TnI levels, we used a series of four Cox proportional hazard regression models, adjusting stepwise for established mortality predictors of COPD, cardiovascular risk factors, and prevalent cardiovascular diseases. The first model was unadjusted. The second was adjusted for established mortality predictors in COPD, specifically the components of the BODE score (BMI, FEV<sub>1</sub>, mMRC, and 6MWD) plus age, hypoxemia, hypercapnia, presence of severe exacerbations in the

prior year, and a correction for alpha-1 antitrypsin deficiency. The third model added further adjustments for the cardiovascular risk factors sex, hypertension, diabetes, smoking status, hyperlipidemia, eGFR, and log hs-CRP. The final model also added adjustments for cardiovascular diseases, i.e., coronary artery disease, history of myocardial infarction, history of stroke, decreased ABI, and log NT-proBNP. All Cox analyses were performed twice, first including continuous log-transformed hs-TnI values and second with hs-TnI dichotomized with the cut-off of 6 ng/L.

Finally, we calculated a composite variable from BODE index and hs-TnI to visualize the effect of hs-TnI as an additional predictor of survival, and in particular the relative risk in patients with high hs-TnI and high BODE index compared to those with low hs-TnI and high BODE index. The added discriminative power offered by the addition of hs-TnI to FEV<sub>1</sub> and to the BODE score was analyzed using C statistics based on the beta coefficients derived from Cox regression models.(16, 17) Differences in the C statistic, i.e., hs-TnI plus FEV<sub>1</sub> versus FEV<sub>1</sub> alone and hs-TnI plus BODE score versus BODE score alone, were estimated using the method described by Antolini et al.(18)

Logistic regression analyses were used to analyze the predictive value of hs-TnI for future exacerbations and exacerbation related hospitalizations, separately.

## **Results**

Levels of hs-TnI according to the GOLD groups A to D are presented in Figure E2.

There were significant differences of hs-TnI values across the groups ( $p < 0.001$ ) with higher levels in group B and D and lower levels in group A and C (Figure E2).

Cardiovascular risk factors and prevalent cardiovascular diseases according to hs-TnI quartiles differentiated for women and men separately are presented in tables E1 and E2. Some markers only differed significantly across the hs-TnI quartiles in men, such as coronary artery disease and history of myocardial infarction.

## References

1. Karch A, Vogelmeier C, Welte T, Bals R, Kauczor HU, Biederer J, et al. The German COPD cohort COSYCONET: Aims, methods and descriptive analysis of the study population at baseline. *Respiratory medicine*. 2016;114:27-37.
2. Kahnert K, Alter P, Young D, Lucke T, Heinrich J, Huber RM, et al. The revised GOLD 2017 COPD categorization in relation to comorbidities. *Respiratory medicine*. 2018;134:79-85.
3. Vogelmeier CF, Criner GJ, Martinez FJ, Anzueto A, Barnes PJ, Bourbeau J, et al. Global Strategy for the Diagnosis, Management, and Prevention of Chronic Obstructive Lung Disease 2017 Report. GOLD Executive Summary. *American journal of respiratory and critical care medicine*. 2017;195(5):557-82.
4. Celli BR, Cote CG, Marin JM, Casanova C, Montes de Oca M, Mendez RA, et al. The body-mass index, airflow obstruction, dyspnea, and exercise capacity index in chronic obstructive pulmonary disease. *The New England journal of medicine*. 2004;350(10):1005-12.
5. Singh D, Agusti A, Anzueto A, Barnes PJ, Bourbeau J, Celli BR. Global Strategy for the Diagnosis, Management, and Prevention of Chronic Obstructive Lung Disease: the GOLD science committee report 2019. 2019;53(5).
6. Kahnert K, Alter P, Welte T, Huber RM, Behr J, Biertz F, et al. Uric acid, lung function, physical capacity and exacerbation frequency in patients with COPD: a multi-dimensional approach. *Respiratory research*. 2018;19(1):110.
7. Rabe KF, Hurd S, Anzueto A, Barnes PJ, Buist SA, Calverley P, et al. Global strategy for the diagnosis, management, and prevention of chronic obstructive pulmonary disease: GOLD executive summary. *American journal of respiratory and critical care medicine*. 2007;176(6):532-55.
8. Lucke T, Herrera R, Wacker M, Holle R, Biertz F, Nowak D, et al. Systematic Analysis of Self-Reported Comorbidities in Large Cohort Studies - A Novel Stepwise Approach by Evaluation of Medication. *PloS one*. 2016;11(10):e0163408.
9. Piepoli MF, Hoes AW, Agewall S, Albus C, Brotons C, Catapano AL, et al. 2016 European Guidelines on cardiovascular disease prevention in clinical practice: The Sixth Joint Task Force of the European Society of Cardiology and Other Societies on Cardiovascular Disease Prevention in Clinical Practice (constituted by representatives of 10 societies and by invited experts) Developed with the special contribution of the European Association for Cardiovascular Prevention & Rehabilitation (EACPR). *European heart journal*. 2016;37(29):2315-81.
10. Levey AS, Stevens LA, Schmid CH, Zhang YL, Castro AF, 3rd, Feldman HI, et al. A new equation to estimate glomerular filtration rate. *Annals of internal medicine*. 2009;150(9):604-12.
11. Houben-Wilke S, Jorres RA, Bals R, Franssen FM, Glaser S, Holle R, et al. Peripheral Artery Disease and Its Clinical Relevance in Patients with Chronic Obstructive Pulmonary Disease in the COPD and Systemic Consequences-Comorbidities Network Study. *American journal of respiratory and critical care medicine*. 2017;195(2):189-97.
12. Fowkes FG, Murray GD, Butcher I, Heald CL, Lee RJ, Chambless LE, et al. Ankle brachial index combined with Framingham Risk Score to predict cardiovascular events and mortality: a meta-analysis. *Jama*. 2008;300(2):197-208.



13. Ponikowski P, Voors AA, Anker SD, Bueno H, Cleland JG, Coats AJ, et al. 2016 ESC Guidelines for the diagnosis and treatment of acute and chronic heart failure: The Task Force for the diagnosis and treatment of acute and chronic heart failure of the European Society of Cardiology (ESC). Developed with the special contribution of the Heart Failure Association (HFA) of the ESC. *European journal of heart failure*. 2016;18(8):891-975.
14. Alter P, Jorres RA, Watz H, Welte T, Glaser S, Schulz H, et al. Left ventricular volume and wall stress are linked to lung function impairment in COPD. *International journal of cardiology*. 2018;261:172-8.
15. Lang RM, Badano LP, Mor-Avi V, Afilalo J, Armstrong A, Ernande L, et al. Recommendations for cardiac chamber quantification by echocardiography in adults: an update from the American Society of Echocardiography and the European Association of Cardiovascular Imaging. *Journal of the American Society of Echocardiography : official publication of the American Society of Echocardiography*. 2015;28(1):1-39.e14.
16. Celli BR, Locantore N, Yates J, Tal-Singer R, Miller BE, Bakke P, et al. Inflammatory biomarkers improve clinical prediction of mortality in chronic obstructive pulmonary disease. *American journal of respiratory and critical care medicine*. 2012;185(10):1065-72.
17. Waschki B, Kirsten A, Holz O, Muller KC, Meyer T, Watz H, et al. Physical activity is the strongest predictor of all-cause mortality in patients with COPD: a prospective cohort study. *Chest*. 2011;140(2):331-42.
18. Antolini L, Nam B-H, D'Agostino RB. Inference on Correlated Discrimination Measures in Survival Analysis: A Nonparametric Approach. *Communications in Statistics - Theory and Methods*. 2004;33(9):2117-35.

**Table E1. Patients' demographics, cardiovascular risk factors and cardiovascular diseases according to quartiles of high-sensitivity troponin I in men.**

|                                                         | High-sensitivity troponin I quartiles |                |                |               | P for trend in men |
|---------------------------------------------------------|---------------------------------------|----------------|----------------|---------------|--------------------|
|                                                         | <2.49 ng/L                            | 2.50–3.79 ng/L | 3.80–6.59 ng/L | ≥6.60 ng/L    |                    |
| Age, years, mean (SD)                                   | 63.8 (8.4)                            | 65.5 (8.1)     | 66.2 (8.2)     | 67.3 (7.9)    | <0.001             |
| BMI, kg/m <sup>2</sup> , mean (SD)                      | 26.5 (4.4)                            | 27.1 (4.9)     | 27.2 (4.9)     | 27.8 (5.1)    | 0.001              |
| Current smoker, n (%)                                   | 69 (27.1)                             | 72 (23.3)      | 76 (23.0)      | 80 (21.3)     | 0.12               |
| Hypertension, n (%)                                     | 184 (72.2)                            | 219 (70.9)     | 244 (73.7)     | 307 (81.9)    | 0.002              |
| Glycated hemoglobin, mmol/mol, mean (SD)                | 41.2 (7.3)                            | 41.6 (8.2)     | 41.7 (8.0)     | 42.4 (8.6)    | 0.071              |
| Diabetes mellitus, n (%)                                | 46 (18.0)                             | 57 (18.4)      | 74 (22.4)      | 91 (24.3)     | 0.026              |
| Total cholesterol / HDL cholesterol ratio, median (IQR) | 3.5 (2.8–4.5)                         | 3.7 (2.9–4.6)  | 3.6 (2.9–4.6)  | 3.7 (2.9–4.6) | 0.70               |
| Hyperlipidemia, n (%)                                   | 127 (49.8)                            | 153 (49.5)     | 186 (56.2)     | 216 (57.6)    | 0.016              |
| eGFR, mL/min, median (IQR)                              | 85 (71–99)                            | 83 (69–96)     | 81 (70–94)     | 78 (66–95)    | 0.004              |
| eGFR <60 mL/min, n (%)                                  | 24 (9.5)                              | 33 (10.7)      | 32 (9.8)       | 60 (16.1)     | 0.014              |
| hs-CRP, mg/L, median (IQR)                              | 3.9 (1.8–6.3)                         | 4.9 (2.0–7.1)  | 4.8 (2.2–7.3)  | 4.3 (2.1–9.0) | 0.27               |
| Coronary artery disease, n (%)                          | 59 (23.1)                             | 51 (16.5)      | 68 (20.5)      | 113 (30.1)    | 0.006              |
| History of myocardial infarction, n (%)                 | 23 (9.0)                              | 21 (6.8)       | 35 (10.6)      | 66 (17.6)     | <0.001             |
| History of stroke, n (%)                                | 9 (3.5)                               | 15 (4.9)       | 12 (3.6)       | 20 (5.3)      | 0.42               |
| Ankle-brachial index ≤0.9, n (%)                        | 20 (7.9)                              | 22 (7.3)       | 33 (10.1)      | 45 (12.4)     | 0.025              |
| NT-proBNP, pg/mL, median (IQR)                          | 184 (35–366)                          | 187 (28–386)   | 175 (32–378)   | 235 (52–501)  | 0.024              |
| Left ventricular ejection fraction <50%, n (%)          | 15 (6.6)                              | 13 (5.1)       | 21 (7.6)       | 39 (12.7)     | 0.004              |
| Right ventricular dysfunction, n (%)                    | 8 (3.6)                               | 14 (5.3)       | 14 (4.9)       | 34 (10.6)     | 0.001              |

Abbreviations: BMI = body mass index; eGFR = estimated glomerular filtration rate; HDL = high-density lipoprotein; hs-CRP = high-sensitivity C-reactive protein; NT-proBNP = N-terminal pro-brain natriuretic peptide.

Variables showing a skewed distribution are presented as median (IQR) and analyzed with Kruskal Wallis Test.

**Table E2. Patients' demographics, cardiovascular risk factors and cardiovascular diseases according to quartiles of high-sensitivity troponin I in women.**

|                                                         | High-sensitivity troponin I quartiles |                |                |               | P for trend in women |
|---------------------------------------------------------|---------------------------------------|----------------|----------------|---------------|----------------------|
|                                                         | <2.49 ng/L                            | 2.50–3.79 ng/L | 3.80–6.59 ng/L | ≥6.60 ng/L    |                      |
| Age, years, mean (SD)                                   | 61.6 (8.7)                            | 65.1 (8.1)     | 64.7 (8.0)     | 64.5 (8.2)    | 0.002                |
| BMI, kg/m <sup>2</sup> , mean (SD)                      | 25.4 (5.1)                            | 26.2 (5.7)     | 25.9 (5.8)     | 26.0 (5.8)    | 0.37                 |
| Current smoker, n (%)                                   | 87 (34.3)                             | 55 (26.2)      | 42 (22.0)      | 39 (24.5)     | 0.009                |
| Hypertension, n (%)                                     | 168 (66.1)                            | 157 (74.8)     | 140 (73.3)     | 122 (76.3)    | 0.030                |
| Glycated hemoglobin, mmol/mol, mean (SD)                | 39.2 (7.0)                            | 39.8 (5.8)     | 40.3 (6.5)     | 39.7 (5.5)    | 0.326                |
| Diabetes mellitus, n (%)                                | 25 (9.8)                              | 19 (9.0)       | 21 (11.0)      | 20 (12.5)     | 0.34                 |
| Total cholesterol / HDL cholesterol ratio, median (IQR) | 3.0 (2.5–3.7)                         | 3.2 (2.5–3.8)  | 3.0 (2.5–3.7)  | 3.1 (2.6–3.7) | 0.81                 |
| Hyperlipidemia, n (%)                                   | 91 (35.8)                             | 93 (44.3)      | 88 (46.1)      | 70 (43.8)     | 0.062                |
| eGFR, mL/min, median (IQR)                              | 83 (71–93)                            | 77 (67–87)     | 75 (65–87)     | 79 (68–98)    | 0.005                |
| eGFR <60 mL/min, n (%)                                  | 22 (8.8)                              | 28 (13.5)      | 29 (15.5)      | 25 (15.8)     | 0.021                |
| hs-CRP, mg/L, median (IQR)                              | 3.3 (1.5–7.8)                         | 4.6 (2.0–7.0)  | 4.0 (1.7–6.2)  | 4.0 (1.6–9.0) | 0.76                 |
| Coronary artery disease, n (%)                          | 19 (7.5)                              | 19 (9.0)       | 13 (6.8)       | 21 (13.1)     | 0.14                 |
| History of myocardial infarction, n (%)                 | 8 (3.1)                               | 8 (3.8)        | 6 (3.1)        | 5 (3.1)       | 0.93                 |
| History of stroke, n (%)                                | 9 (3.5)                               | 6 (2.9)        | 11 (5.8)       | 3 (1.9)       | 0.85                 |
| Ankle-brachial index ≤0.9, n (%)                        | 18 (7.1)                              | 9 (4.4)        | 12 (6.5)       | 11 (7.1)      | 0.91                 |
| NT-proBNP, pg/mL, median (IQR)                          | 130 (16–324)                          | 154 (14–361)   | 180 (32–353)   | 178 (46–394)  | 0.056                |
| Left ventricular ejection fraction <50%, n (%)          | 9 (4.1)                               | 6 (3.2)        | 5 (3.0)        | 6 (4.4)       | 0.98                 |
| Right ventricular dysfunction, n (%)                    | 15 (6.6)                              | 12 (6.3)       | 10 (5.8)       | 13 (9.3)      | 0.46                 |

Abbreviations: BMI = body mass index; eGFR = estimated glomerular filtration rate; HDL = high-density lipoprotein; hs-CRP = high-sensitivity C-reactive protein; NT-proBNP = N-terminal pro-brain natriuretic peptide.

Variables showing a skewed distribution or a heteroscedasticity are presented as median (IQR) and analyzed with Kruskal Wallis Test.

Figure E1. Patient flow diagram

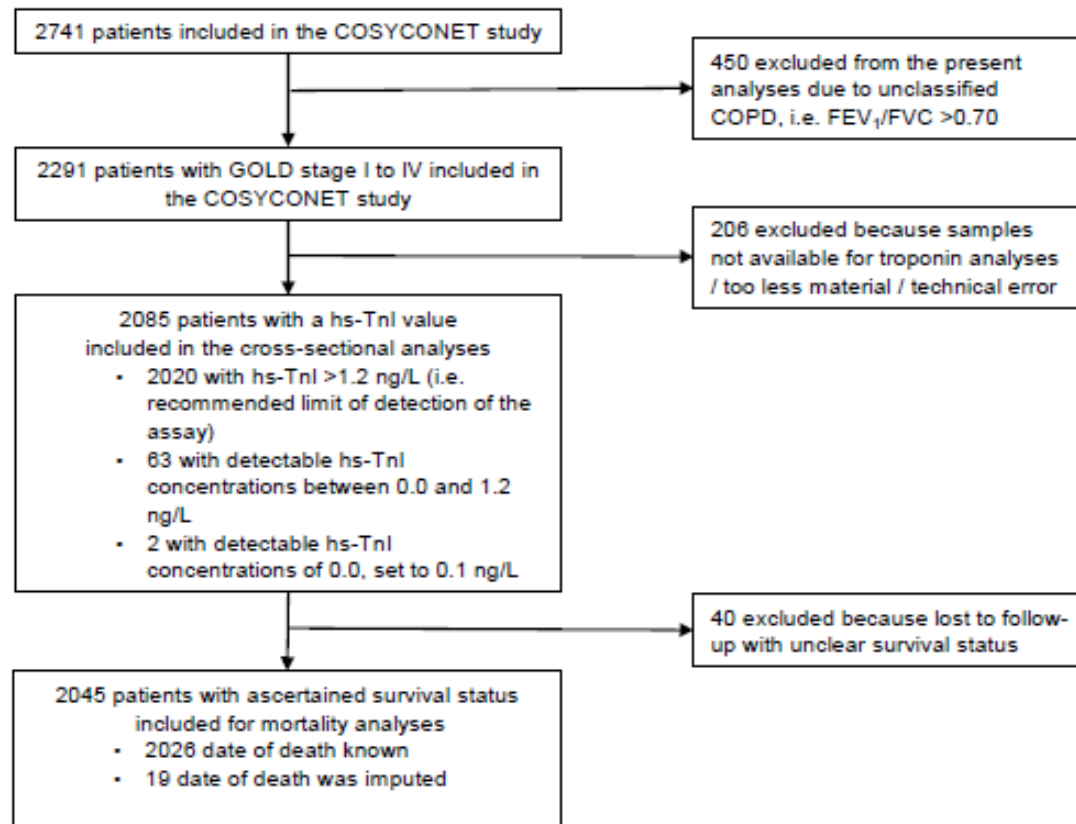

**Figure E2. High-sensitivity troponin I levels according to GOLD groups**

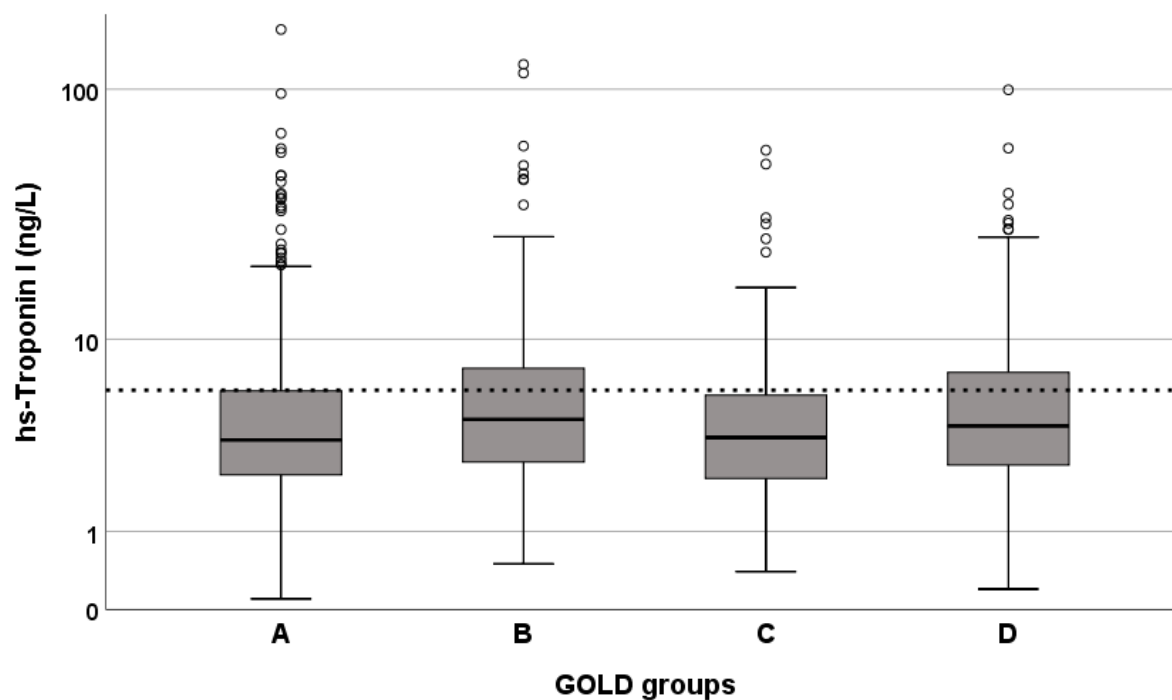

Legend Figure E2:

Hs-troponin I levels differed significantly across the GOLD groups ( $p < 0.001$ ). The bars represent the interquartile range and the solid lines within the bars the median values. The dashed line represent the established hs-TnI cut-off of 6 ng/L, indicating an elevated cardiovascular risk.
