# Supplementary material
Source: HighWire-hosted journal article supplement (https://erj.ersjournals.com/content/55/2/1901314)
Supplement: inline-supplementary-material-2 [file inline-supplementary-material-2.pdf]

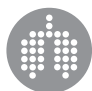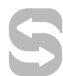

SHAREABLE PDF

# High-sensitivity troponin I and all-cause mortality in patients with stable COPD: an analysis of the COSYCONET study

Benjamin Waschki <sup>1,2,3,4</sup>, Peter Alter <sup>3,5</sup>, Tanja Zeller<sup>1,4</sup>, Christina Magnussen<sup>1,4</sup>, Johannes T. Neumann<sup>1</sup>, Raphael Twerenbold<sup>1</sup>, Christoph Sinning<sup>1</sup>, Christian Herr<sup>6</sup>, Kathrin Kahnert<sup>3,7</sup>, Sebastian Fähndrich<sup>8</sup>, Stefan Blankenberg<sup>1,4</sup>, Klaus F. Rabe<sup>2,3</sup>, Tobias Welte <sup>3,9</sup>, Rudolf A. Jörres<sup>3,10</sup>, Claus F. Vogelmeier<sup>3,5</sup>, Robert Bals <sup>6,12</sup> and Henrik Watz<sup>3,11,12</sup> on behalf of the German COSYCONET Cohort

**Affiliations:** <sup>1</sup>Dept of General and Interventional Cardiology, University Heart Center Hamburg, Hamburg, Germany. <sup>2</sup>LungenClinic Grosshansdorf, Airway Research Center North (ARCN), Grosshansdorf, Germany. <sup>3</sup>German Center for Lung Research (DZL). <sup>4</sup>German Center for Cardiovascular Research (DZHK), partner site Hamburg/Kiel/Lübeck. <sup>5</sup>Dept of Medicine, Pulmonary and Critical Care Medicine, Philipps-University of Marburg (UMR), Marburg, Germany. <sup>6</sup>Dept of Internal Medicine V - Pulmonology, Allergology, Critical Care Medicine, Saarland University Hospital, Homburg, Germany. <sup>7</sup>Dept of Internal Medicine V, University of Munich (LMU), Comprehensive Pneumology Center, Munich, Germany. <sup>8</sup>Dept of Pneumology, University Medical Center Freiburg, Freiburg, Germany. <sup>9</sup>Dept of Respiratory Medicine, Hannover Medical School, Research in Endstage and Obstructive Lung Disease Hannover (BREATH), Hannover, Germany. <sup>10</sup>Institute and Outpatient Clinic for Occupational, Social and Environmental Medicine, University Hospital, Ludwig Maximilians University (LMU) Munich, Comprehensive Pneumology Center Munich (CPC-M), Munich, Germany. <sup>11</sup>Pulmonary Research Institute at LungenClinic Grosshansdorf, ARCN, Grosshansdorf, Germany. <sup>12</sup>Both authors contributed equally.

**Correspondence:** Benjamin Waschki, Dept of General and Interventional Cardiology, University Heart Center Hamburg, Germany and LungenClinic Grosshansdorf, Airway Research Center North (ARCN), German Center for Lung Research (DZL), Grosshansdorf, Germany. E-mail: b.waschki@uke.de

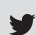

@ERSpublications

**High-sensitivity troponin I is a strong predictor of all-cause mortality in patients with stable COPD independent from established mortality predictors of COPD and irrespective of their cardiovascular risk profile** <http://bit.ly/352ZtDw>

**Cite this article as:** Waschki B, Alter P, Zeller T, *et al.* High-sensitivity troponin I and all-cause mortality in patients with stable COPD: an analysis of the COSYCONET study. *Eur Respir J* 2020; 55: 1901314 [<https://doi.org/10.1183/13993003.01314-2019>].

This single-page version can be shared freely online.

**ABSTRACT** Chronic obstructive pulmonary disease (COPD) is a leading cause of death with a considerable part of the population dying from cardiovascular diseases. High-sensitivity troponin I (hs-TnI) might help to better identify COPD patients at high risk of mortality. We aimed to study the predictive value of hs-TnI for all-cause mortality beyond established COPD assessments, and after consideration of relevant cardiovascular risk factors and prevalent cardiovascular diseases, in a broad population with stable COPD.

Circulating hs-TnI concentrations together with a wide range of respiratory and cardiovascular markers were evaluated in 2085 patients with stable COPD across all severity stages enrolled in the multicentre COSYCONET cohort study. The primary outcome was all-cause mortality over 3 years of follow-up.

Hs-TnI was detectable in 2020 (96.9%) patients. The median hs-TnI concentration was 3.8 ng·L<sup>-1</sup> (interquartile range 2.5–6.6 ng·L<sup>-1</sup>), with levels above the 99th percentile reference limit of 27 ng·L<sup>-1</sup>

observed in 1.8% of patients. In Cox regression analyses including adjustments for airflow limitation, dyspnoea grade, exercise capacity and history of severe exacerbations, as well as traditional cardiovascular risk factors, estimated glomerular filtration rate, ankle-brachial index, N-terminal pro-brain natriuretic peptides and prevalent cardiovascular diseases, hs-TnI was a significant predictor for all-cause mortality, both as a continuous variable (hazard ratio (HR) for log hs-TnI 1.28, 95% CI 1.01–1.62) and categorised according to the cut-off of 6 ng·L<sup>-1</sup> (HR 1.63, 95% CI 1.10–2.42).

In patients with stable COPD, hs-TnI is a strong predictor of all-cause mortality beyond established COPD mortality predictors, and independent of a broad range of cardiovascular risk factors and prevalent cardiovascular diseases. Hs-TnI concentrations well below the upper reference limit provide further prognostic value for all patients with COPD when added to established risk assessments.
